# Supplementary material for: Relationship between the Biological Clock and Inflammatory Bowel Disease
Source: MDPI journal article supplement (doi:10.3390/clockssleep5020021), 2023-05-12
Supplement: s1 [file s1]

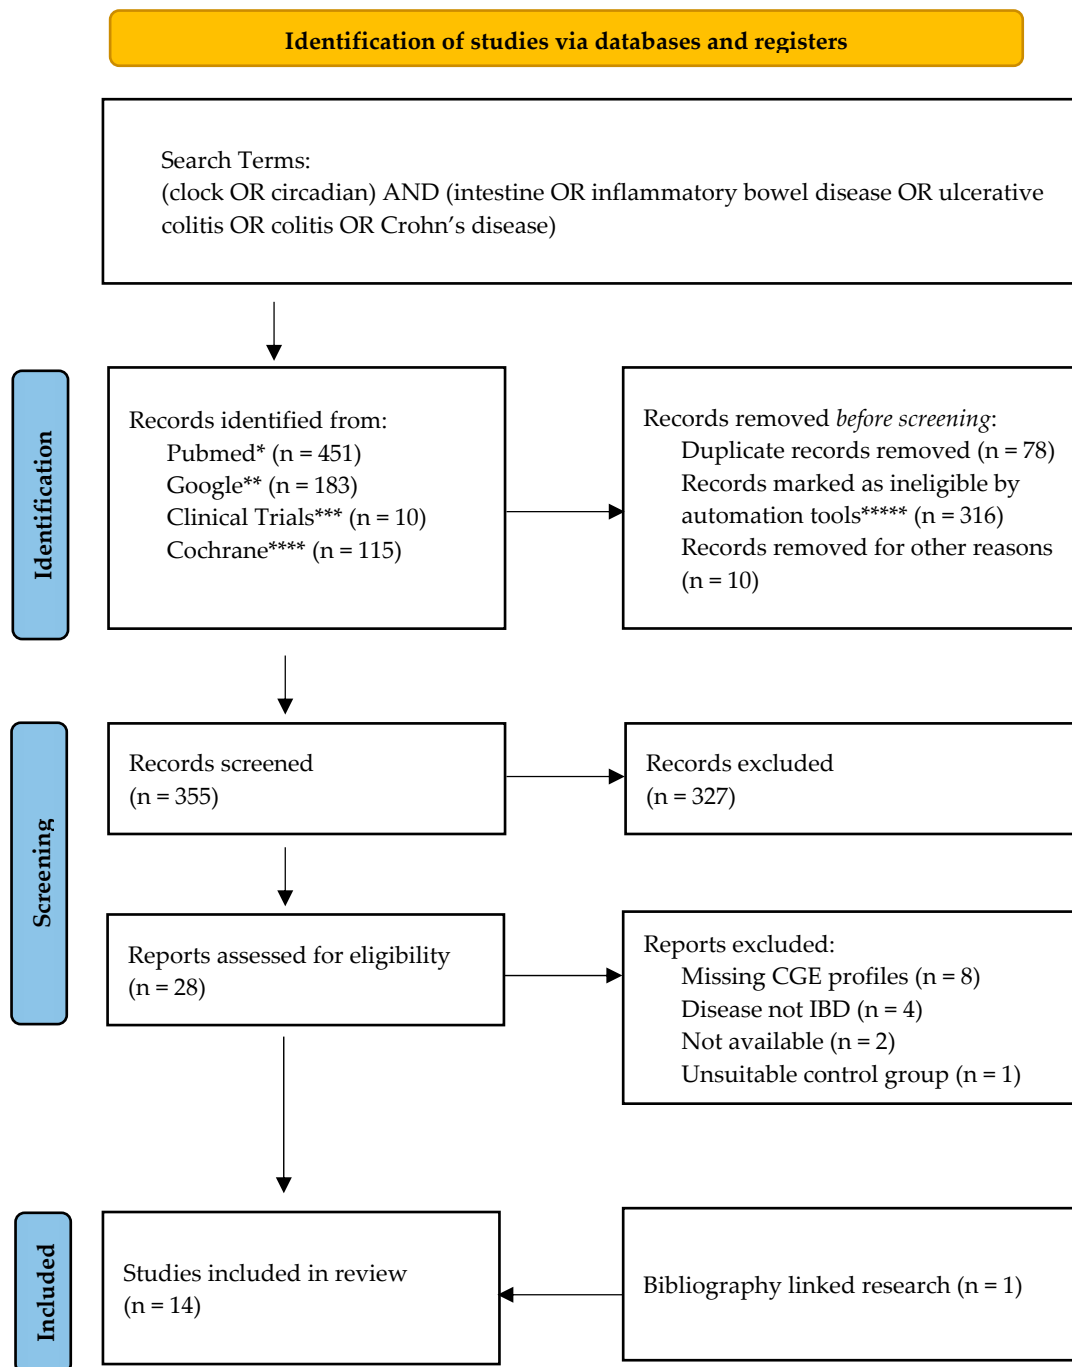

**Figure S1:** Literature Search

\*(title, abstract) + search terms; exact query: (("clock"[Title/Abstract]) OR ("circadian"[Title/Abstract])) AND ((((((("intestine"[Title/Abstract]) OR ("inflammatory bowel disease"[Title/Abstract]) OR ("ulcerative colitis"[Title/Abstract]) OR ("crohn s disease"[Title/Abstract]) OR ("colitis"[Title/Abstract]))))))))

\*\*title + search terms

\*\*\*Disease: Inflammatory Bowel Diseases; Other terms: clock OR circadian

\*\*\*\*Cochrane query: (title, abstract, keyword) + search terms

\*\*\*\*\*ineligibility criteria: research from the past century (beyond year 2000), review articles
